# Supplementary material for: Tumor immunotherapy by plasmid DNAs encoding adenovirus virus-associated RNA
Source: Royal Society of Chemistry journal article supplement (doi:10.1039/d4pm00219a), 2025-01-01
Supplement: d4pm00219a1.pdf [file d4pm00219a1.pdf]

## Supplemental figure

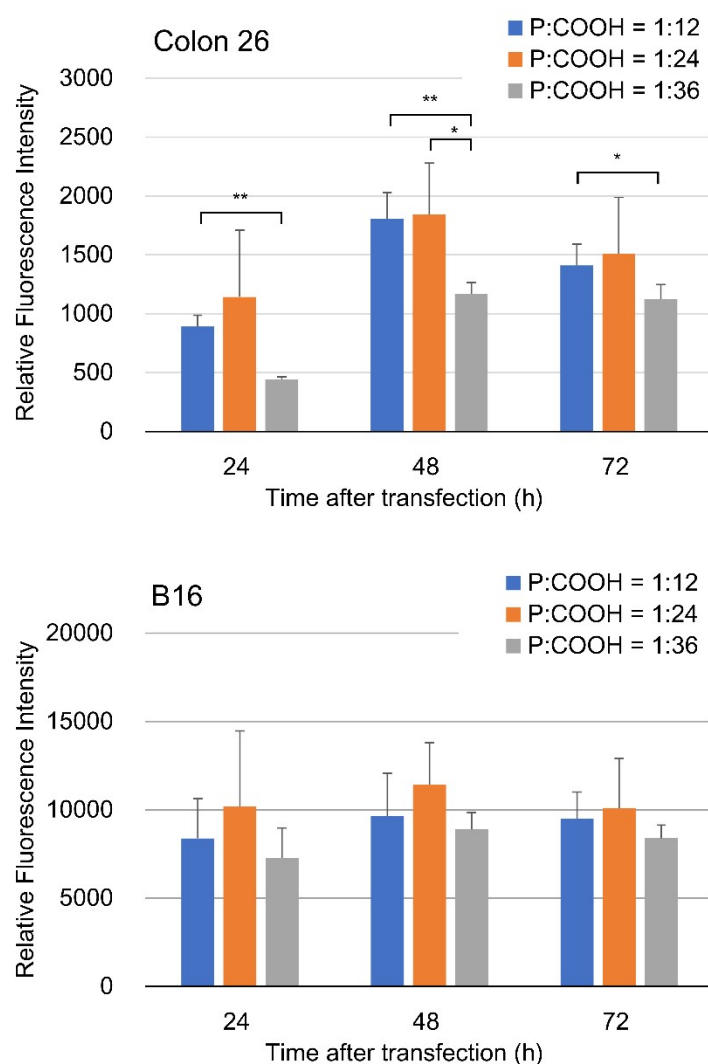

**Fig. S1** GFP expression by pDNA(GFP)/LF3000/HA complexes with P:COOH ratios of 1:12 (blue), 1:24 (orange), or 1:36 (grey) in cultured Colon 26 mouse colon carcinoma cells and B16 mouse melanoma cells, where P represents the phosphorus atoms in DNA and COOH represents the carboxyl groups of HA. (n = 4, mean  $\pm$  SD, \* p < 0.05, \*\* P < 0.01)
